# Supplementary material for: Automated Red Cell Exchange in the Management of Sickle Cell Disease
Source: PubMed Central journal article supplement (PMC7918980; doi:10.3390/jcm10040767), 2021-02-15
Supplement: jcm-10-00767-s001.pdf [file jcm-10-00767-s001.pdf]

**Patient consented for transfusion in the outpatient clinic.**

**Last MDT Review: xx/xx/xxxx**

**Updated: xx/xx/xxxx  
(Clinician in charge)**
